# Supplementary material
Source: MDPI journal article supplement (https://www.mdpi.com/2311-5637/9/8/750)
Supplement: s1 [file s1]

## Supplementary material

### Flash distillation process for stabilization of anaerobic digestate and synthesis of ammonium bicarbonate

Alejandro Moure Abelenda <sup>1,\*</sup>, George Aggidis <sup>1</sup> and Farid Aiouache <sup>1</sup>

<sup>1</sup>School of Engineering, Lancaster University, Lancaster, LA1 4YW, UK

\*Corresponding author: [a.moureabelenda@lancaster.ac.uk](mailto:a.moureabelenda@lancaster.ac.uk); +44 7933712762

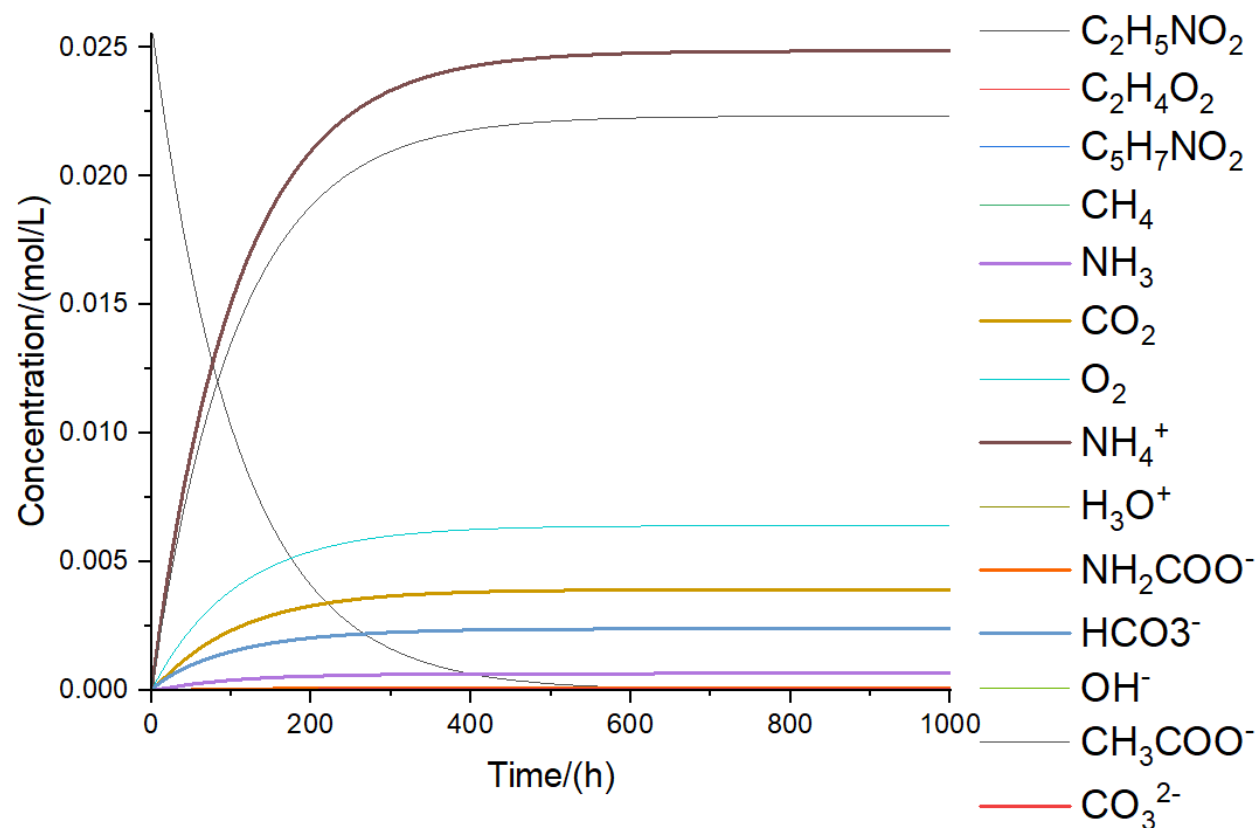

**Figure S1.** Concentration profile of the species of inorganic nitrogen and inorganic carbon during the fermentation of glycine. The feedstock that was considered to perform this anaerobic digestion consisted of 90% moisture.

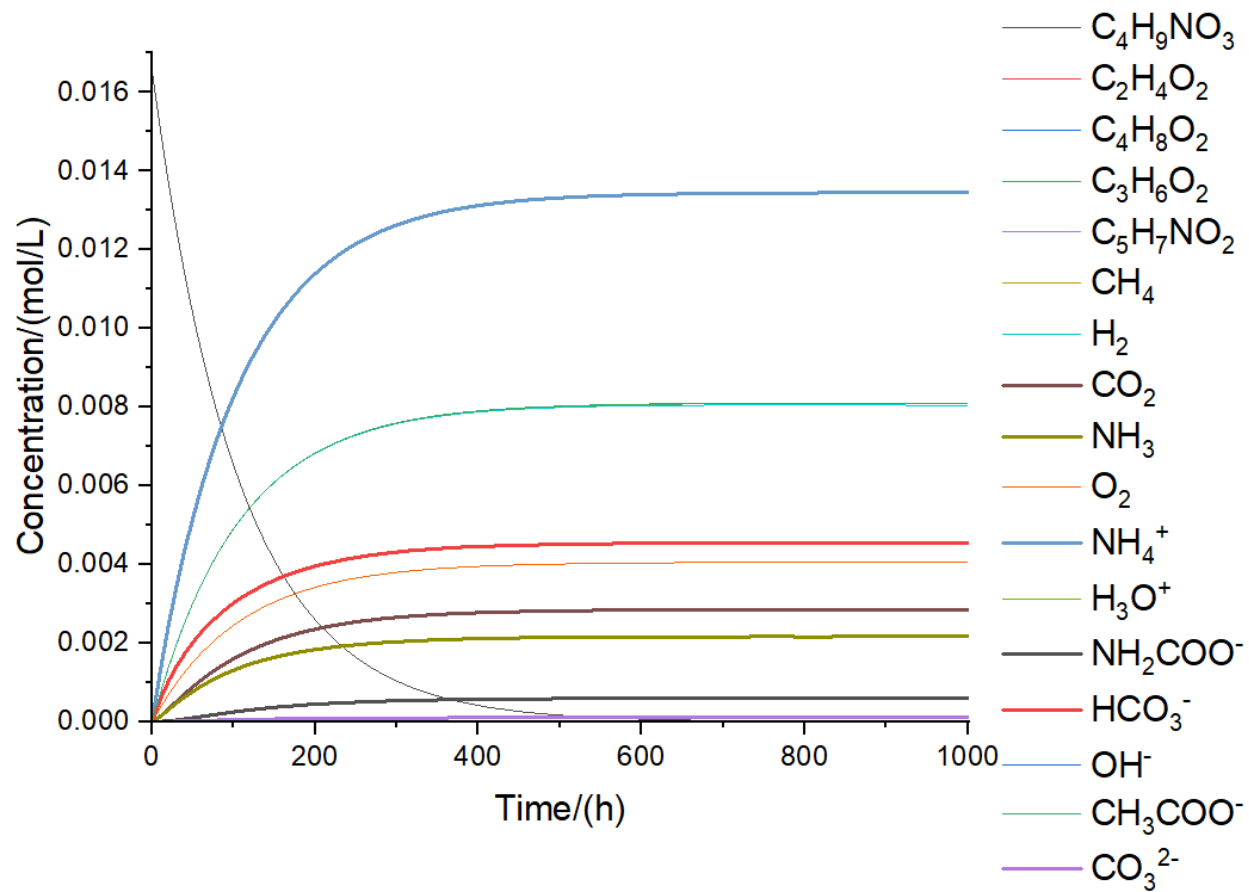

**Figure S2.** Concentration profile of the species of inorganic nitrogen and inorganic carbon during the fermentation of threonine. The feedstock that was considered to perform this anaerobic digestion consisted of 90% moisture.

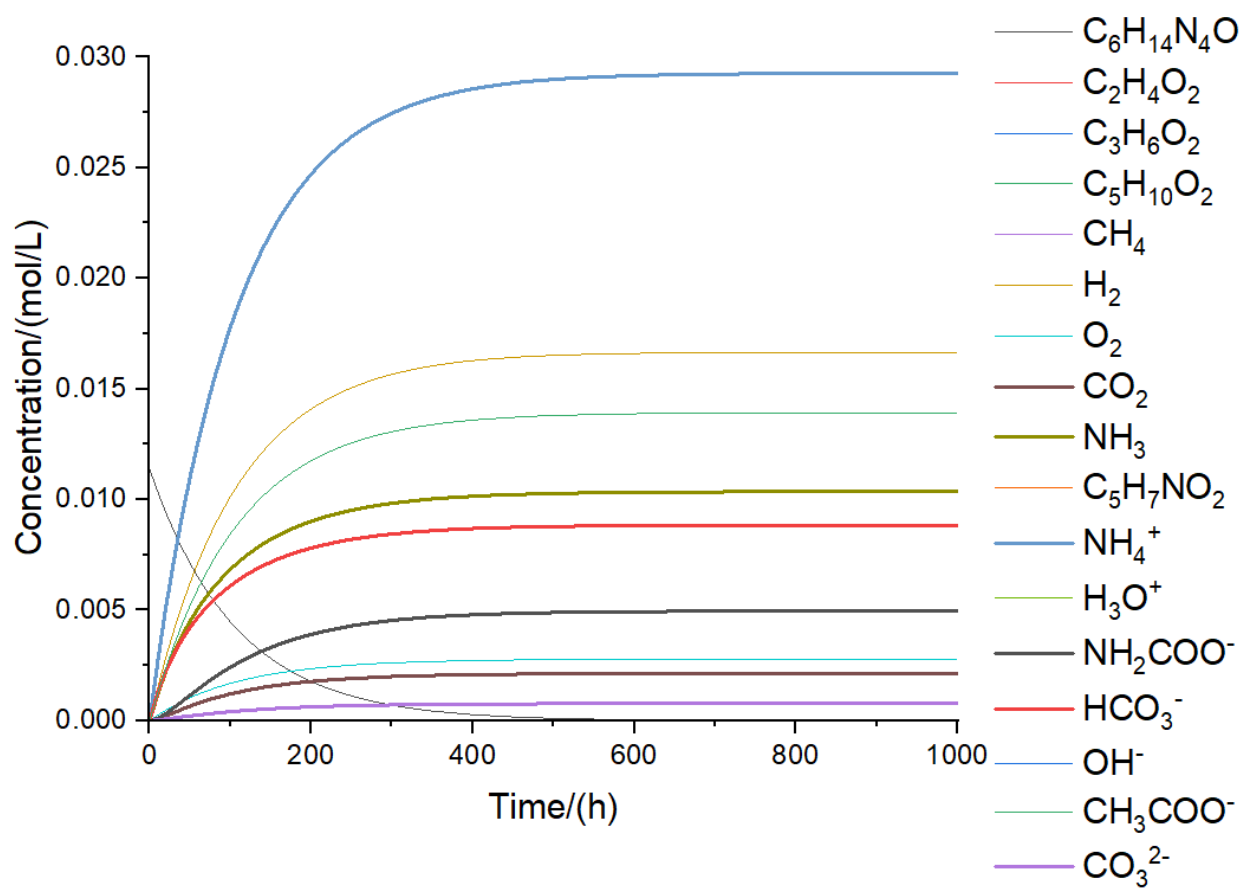

**Figure S3.** Concentration profile of the species of inorganic nitrogen and inorganic carbon during the fermentation of arginine. The feedstock that was considered to perform this anaerobic digestion consisted of 90% moisture.

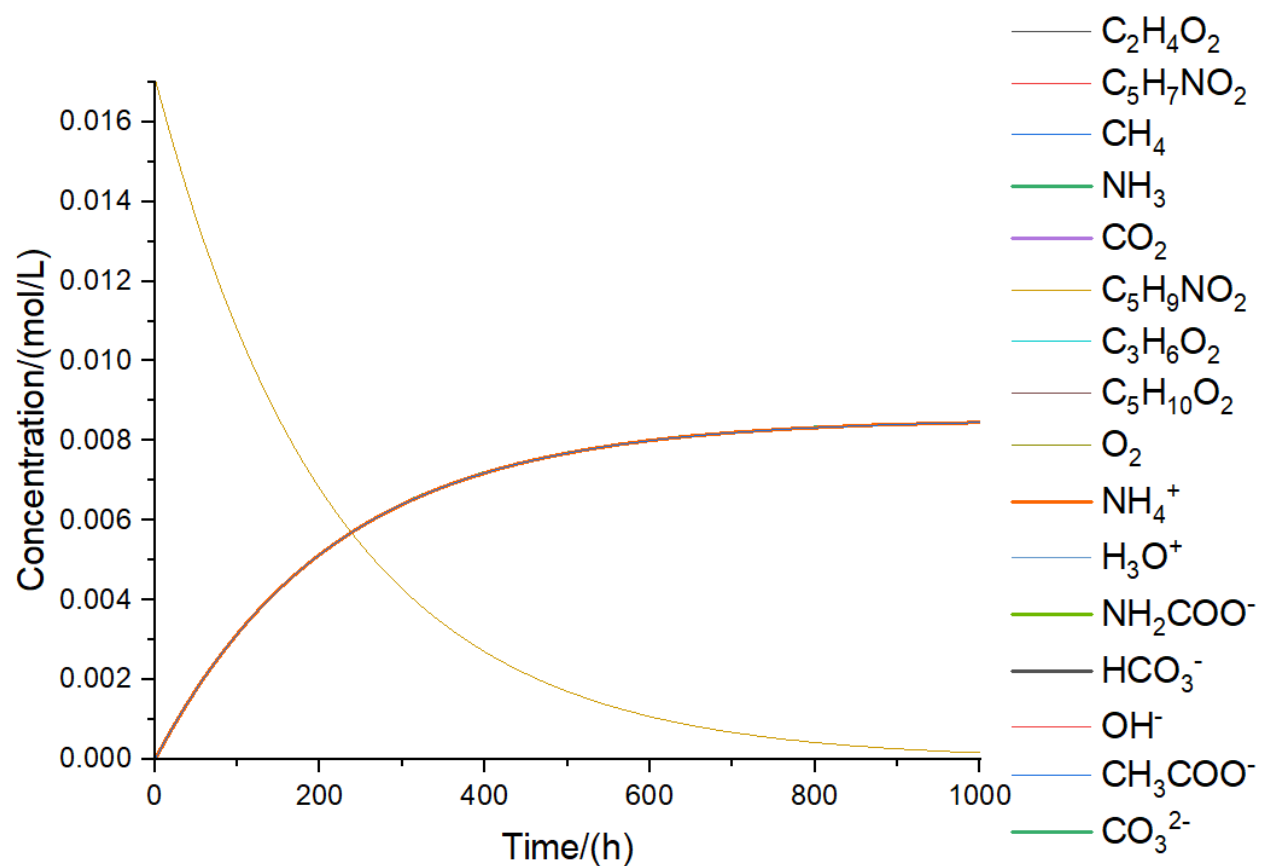

**Figure S4.** Concentration profile of the species of inorganic nitrogen and inorganic carbon during the fermentation of proline. The feedstock that was considered to perform this anaerobic digestion consisted of 90% moisture.

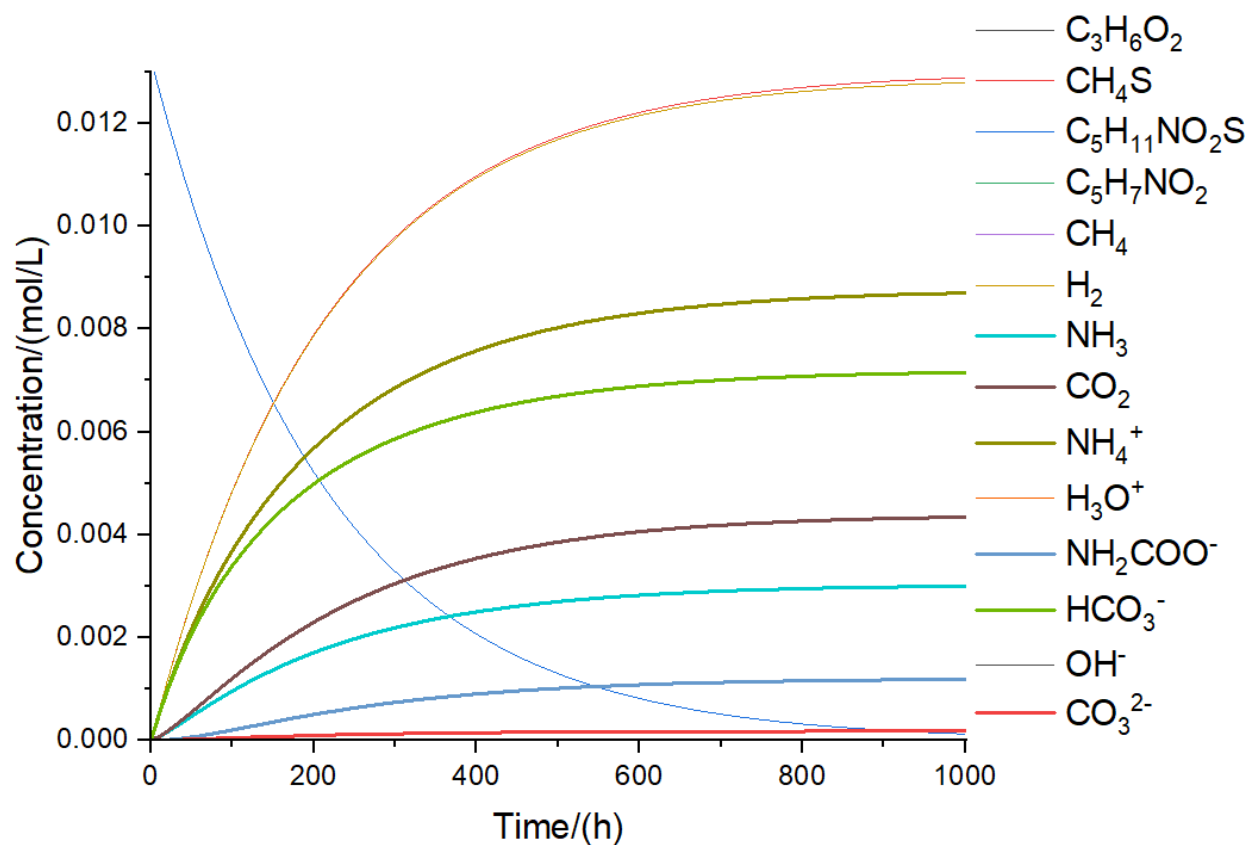

**Figure S5.** Concentration profile of the species of inorganic nitrogen and inorganic carbon during the fermentation of methionine. The feedstock that was considered to perform this anaerobic digestion consisted of 90% moisture.

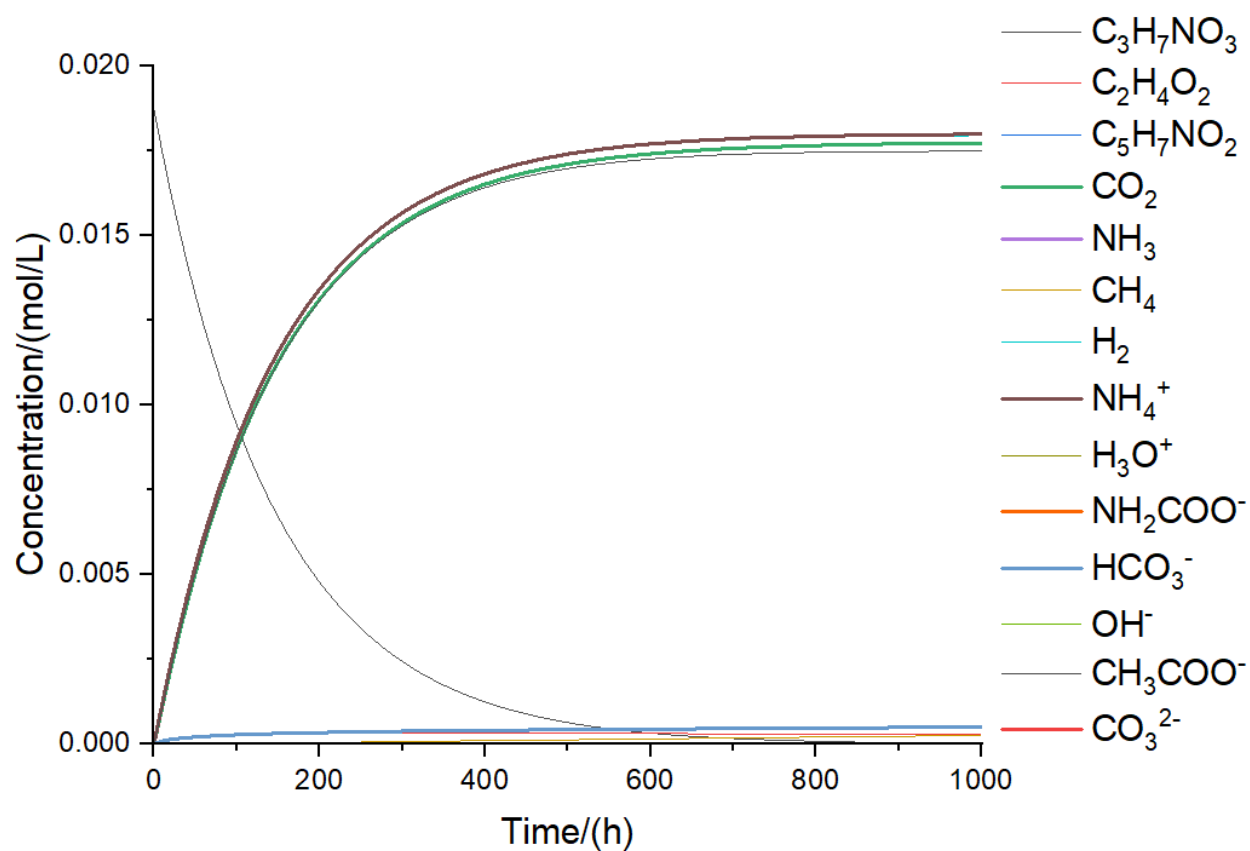

**Figure S6.** Concentration profile of the species of inorganic nitrogen and inorganic carbon during the fermentation of serine. The feedstock that was considered to perform this anaerobic digestion consisted of 90% moisture.

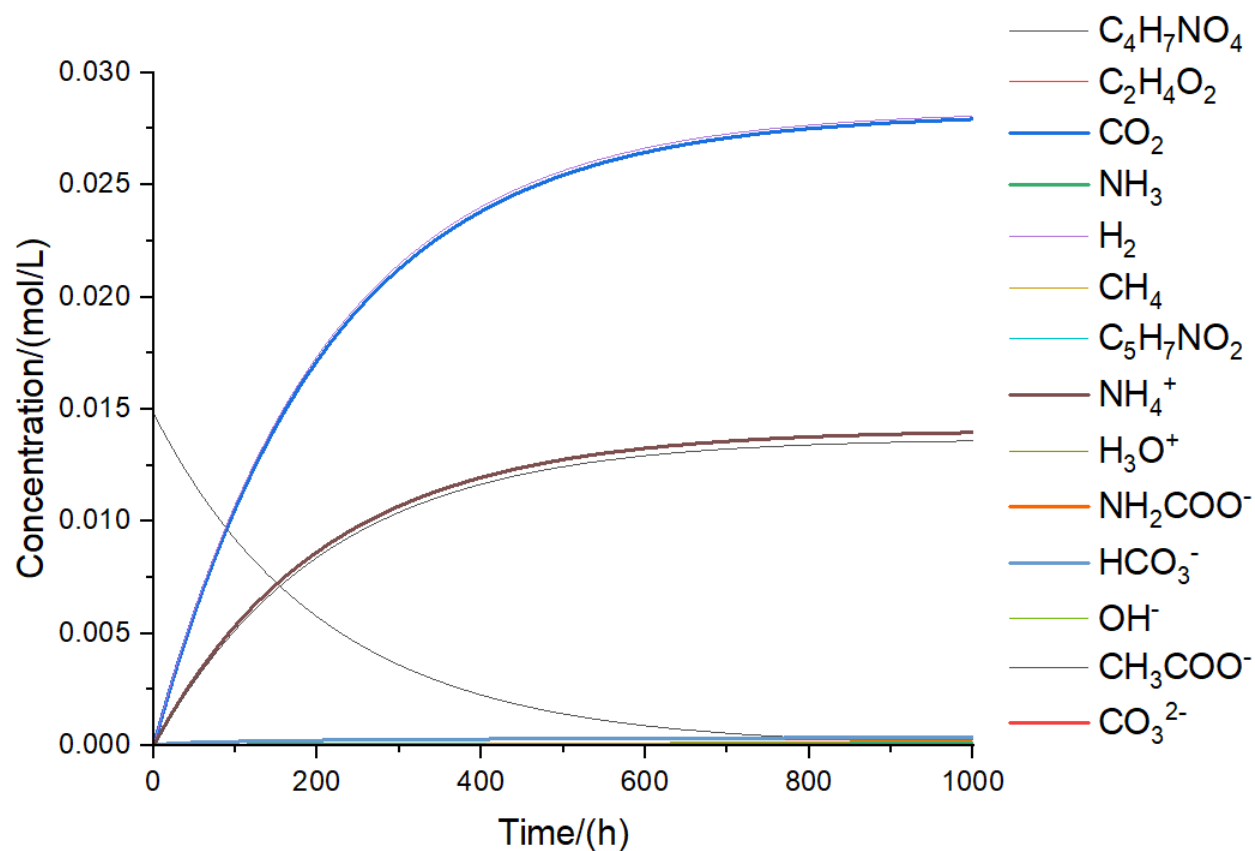

**Figure S7.** Concentration profile of the species of inorganic nitrogen and inorganic carbon during the fermentation of aspartic acid. The feedstock that was considered to perform this anaerobic digestion consisted of 90% moisture.



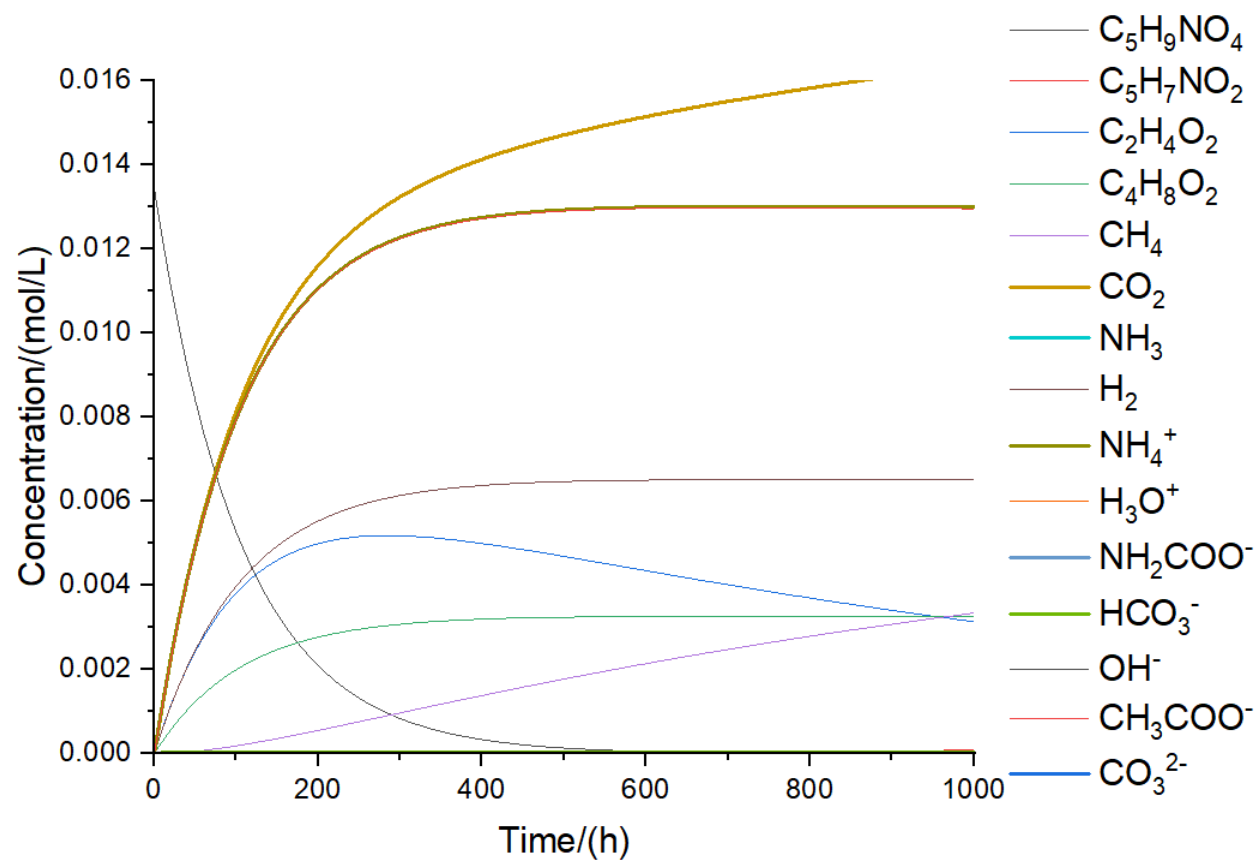

**Figure S8.** Concentration profile of the species of inorganic nitrogen and inorganic carbon during the fermentation of glutamic acid. The feedstock that was considered to perform this anaerobic digestion consisted of 90% moisture.

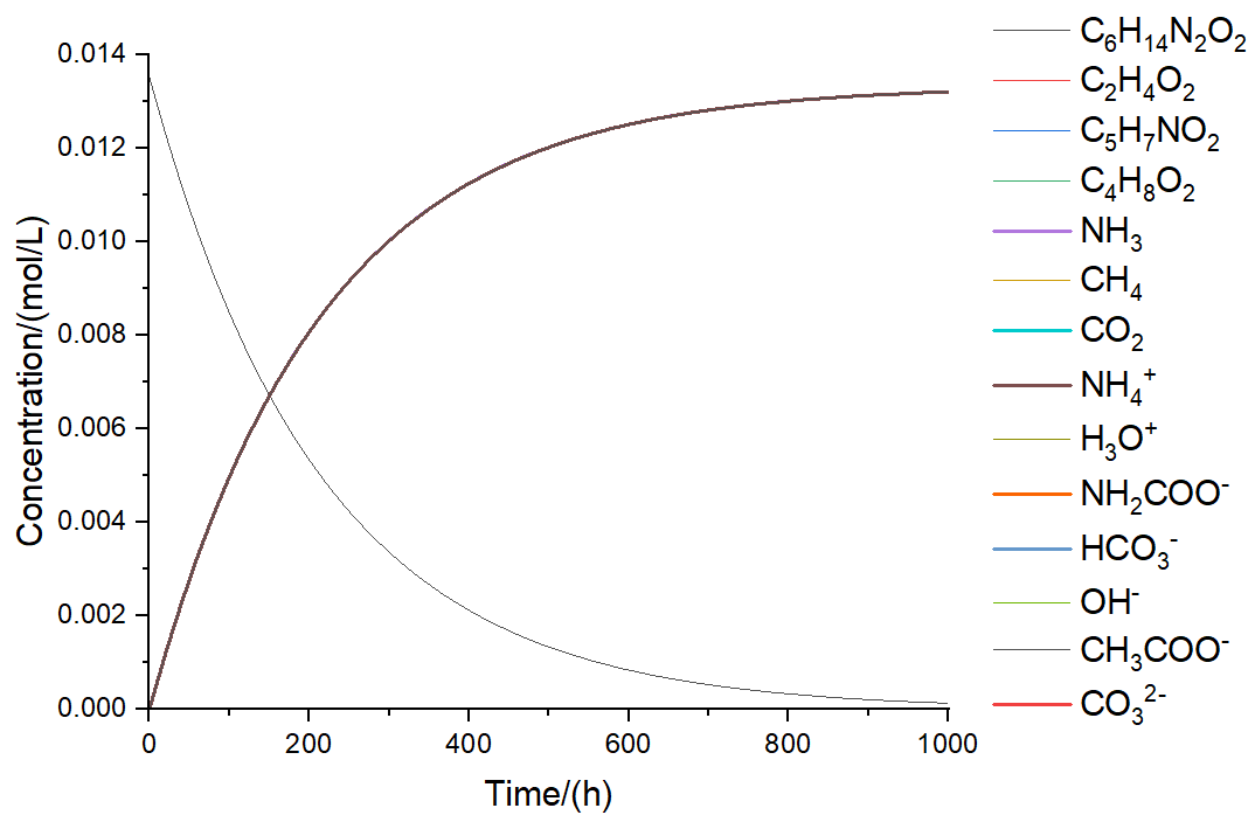

**Figure S9.** Concentration profile of the species of inorganic nitrogen and inorganic carbon during the fermentation of lysine. The feedstock that was considered to perform this anaerobic digestion consisted of 90% moisture.

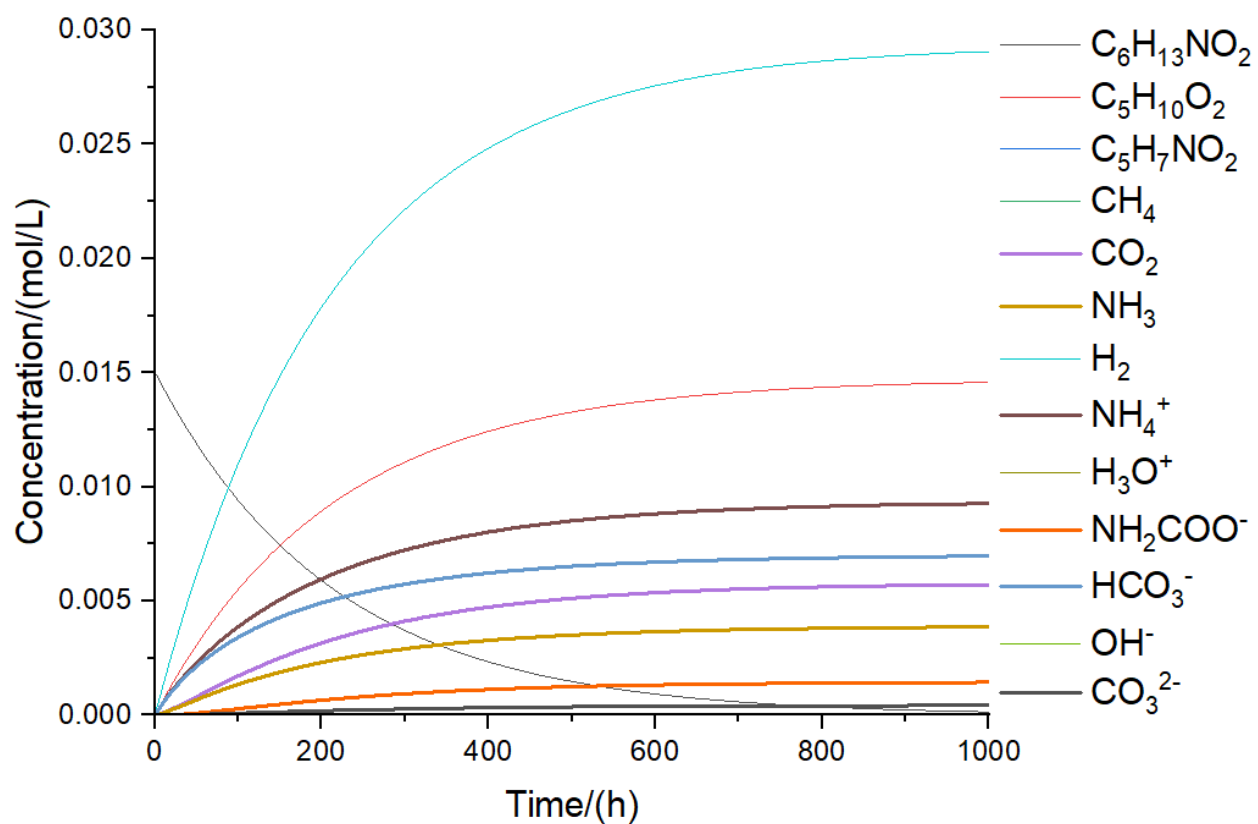

**Figure S10.** Concentration profile of the species of inorganic nitrogen and inorganic carbon during the fermentation of leucine. The feedstock that was considered to perform this anaerobic digestion consisted of 90% moisture.

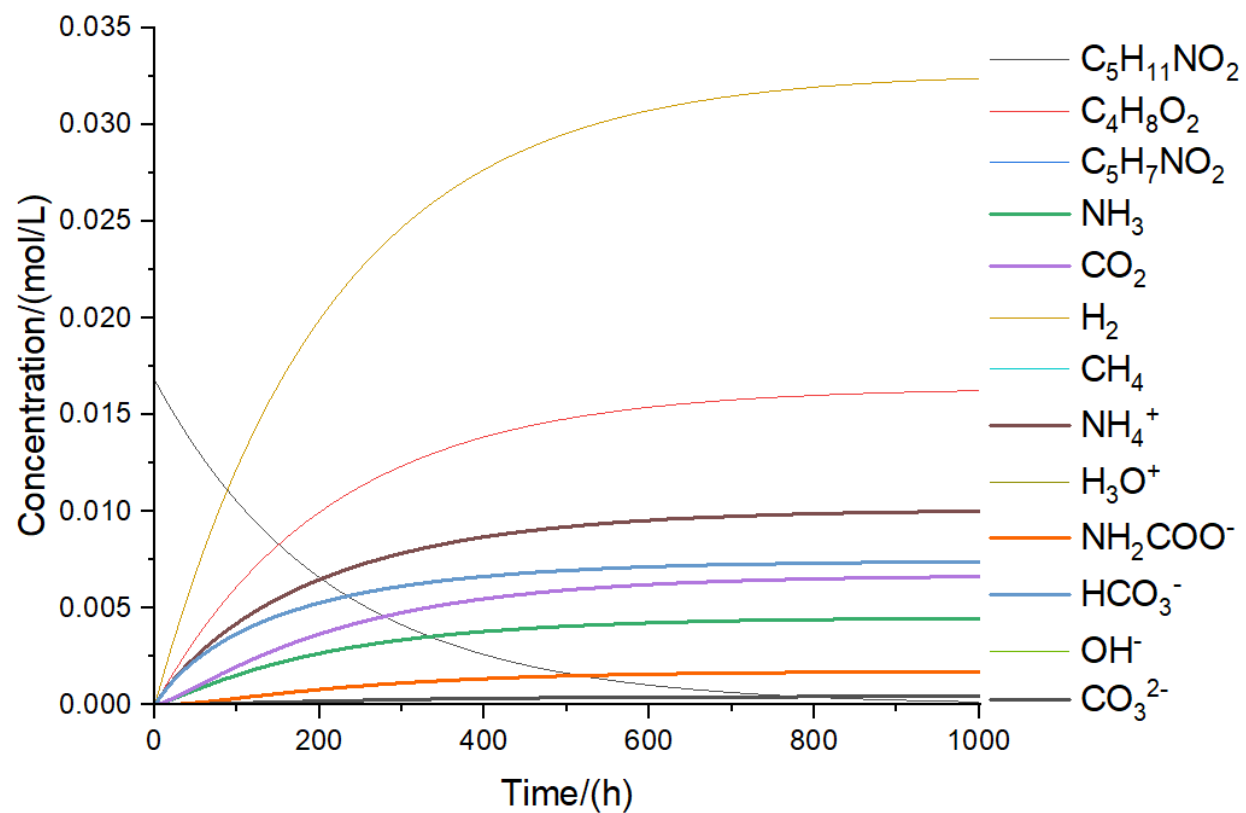

**Figure S11.** Concentration profile of the species of inorganic nitrogen and inorganic carbon during the fermentation of valine. The feedstock that was considered to perform this anaerobic digestion consisted of 90% moisture.

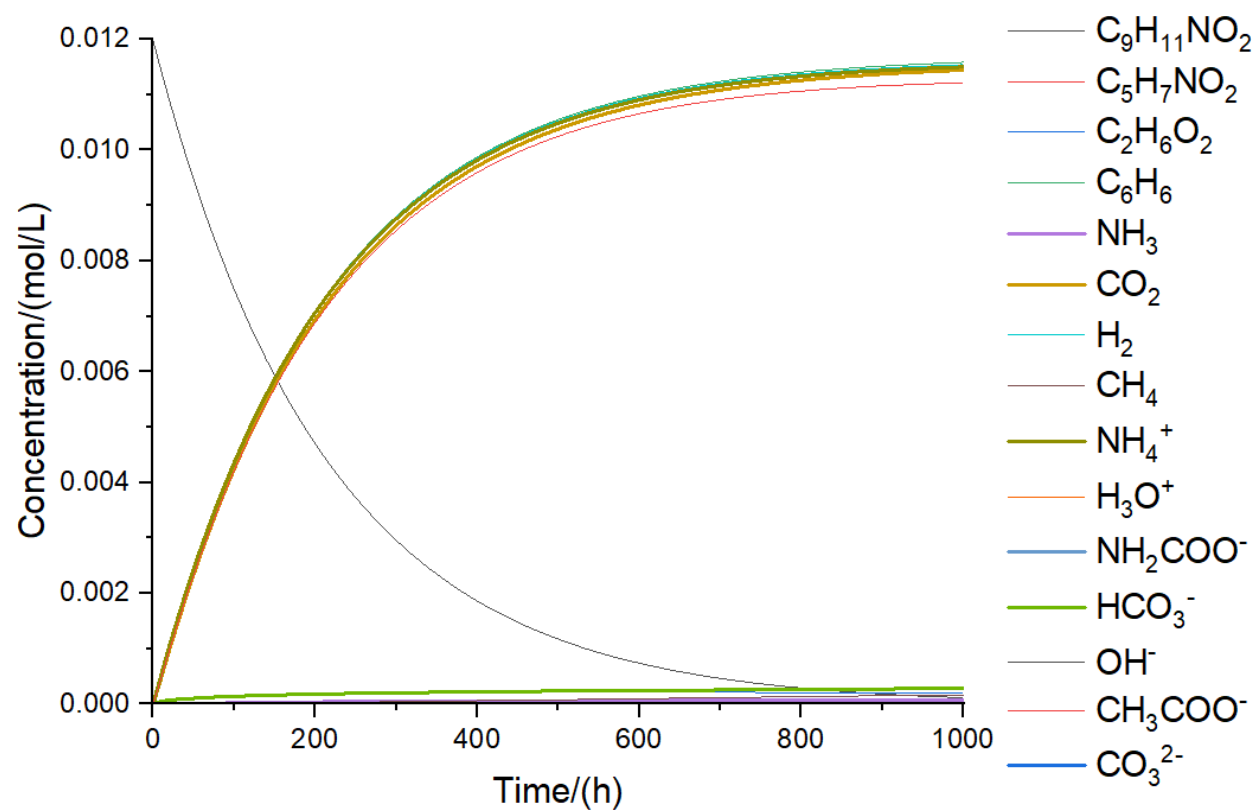

**Figure S12.** Concentration profile of the species of inorganic nitrogen and inorganic carbon during the fermentation of phenylalanine. The feedstock that was considered to perform this anaerobic digestion consisted of 90% moisture.

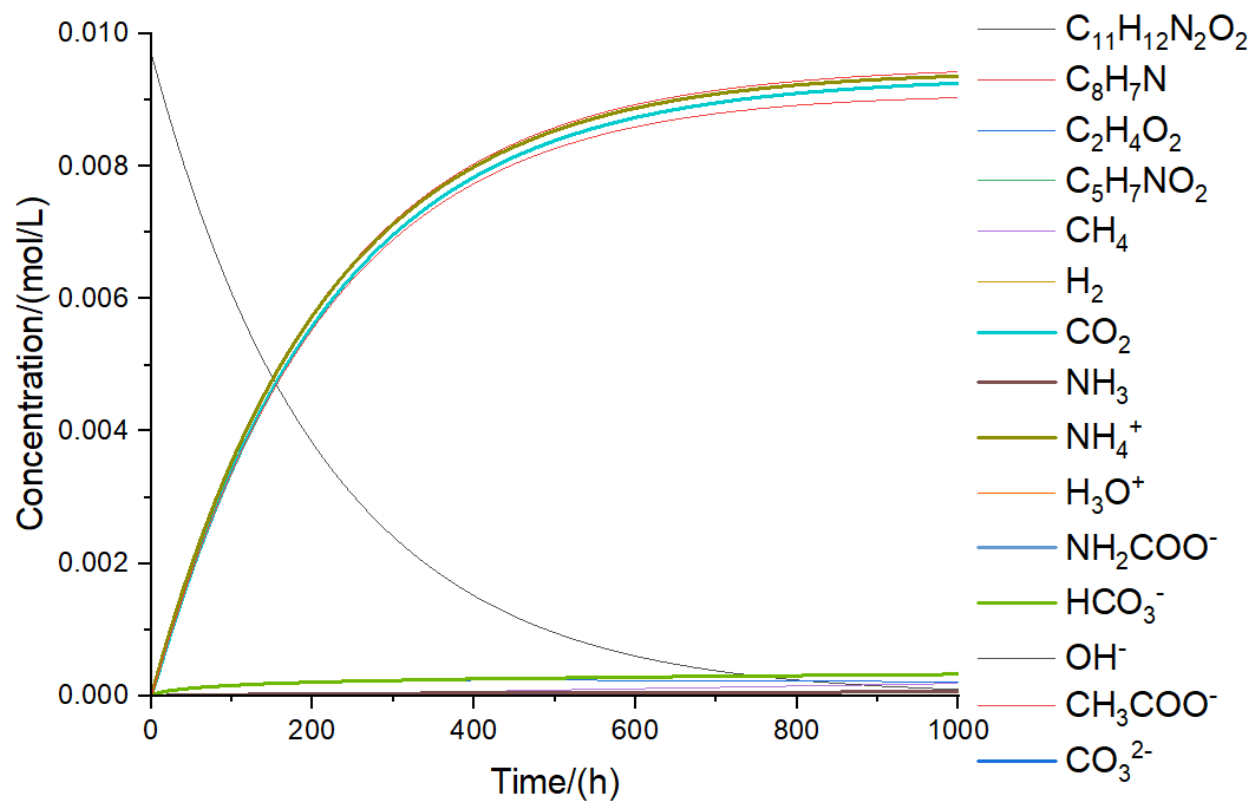

**Figure S13.** Concentration profile of the species of inorganic nitrogen and inorganic carbon during the fermentation of tyrosine. The feedstock that was considered to perform this anaerobic digestion consisted of 90% moisture.

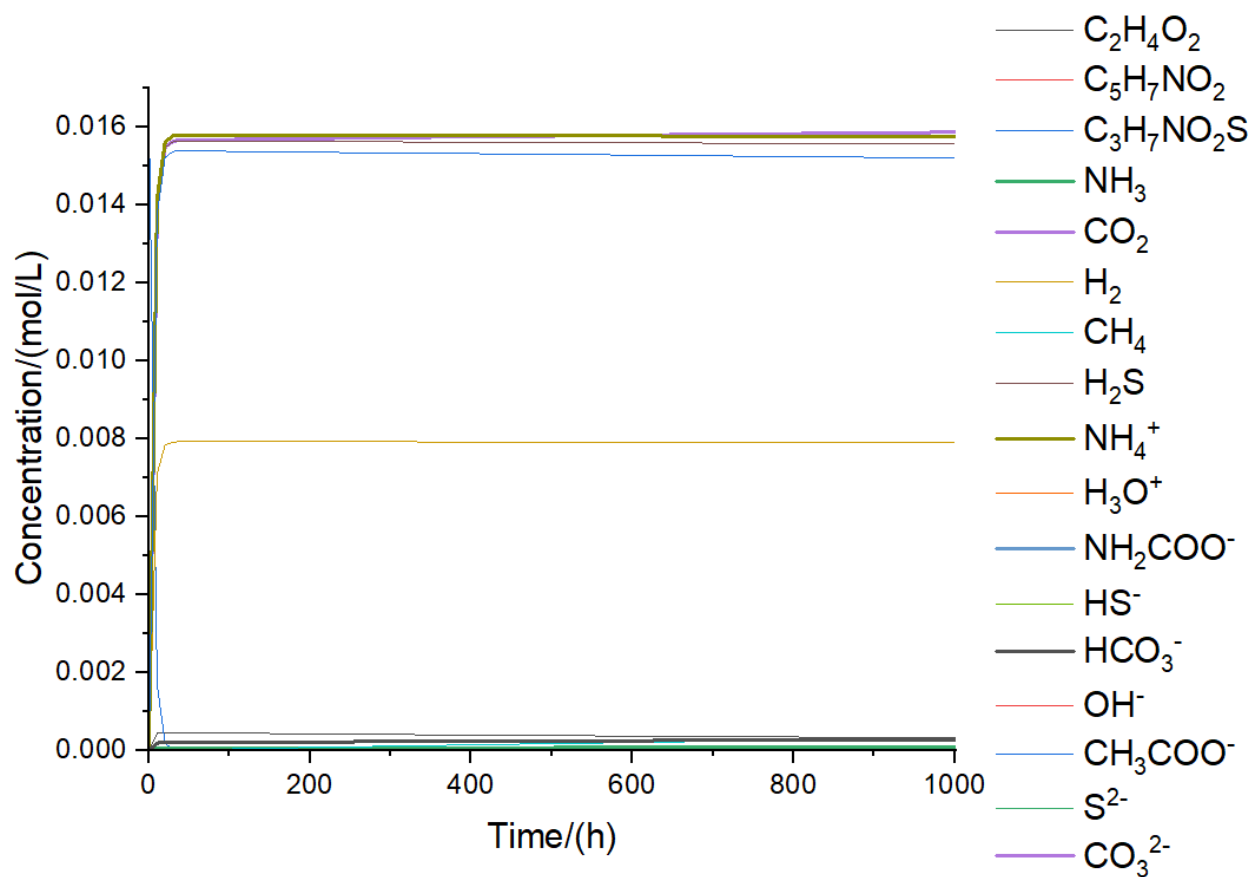

**Figure S14.** Concentration profile of the species of inorganic nitrogen and inorganic carbon during the fermentation of cysteine. The feedstock that was considered to perform this anaerobic digestion consisted of 90% moisture.

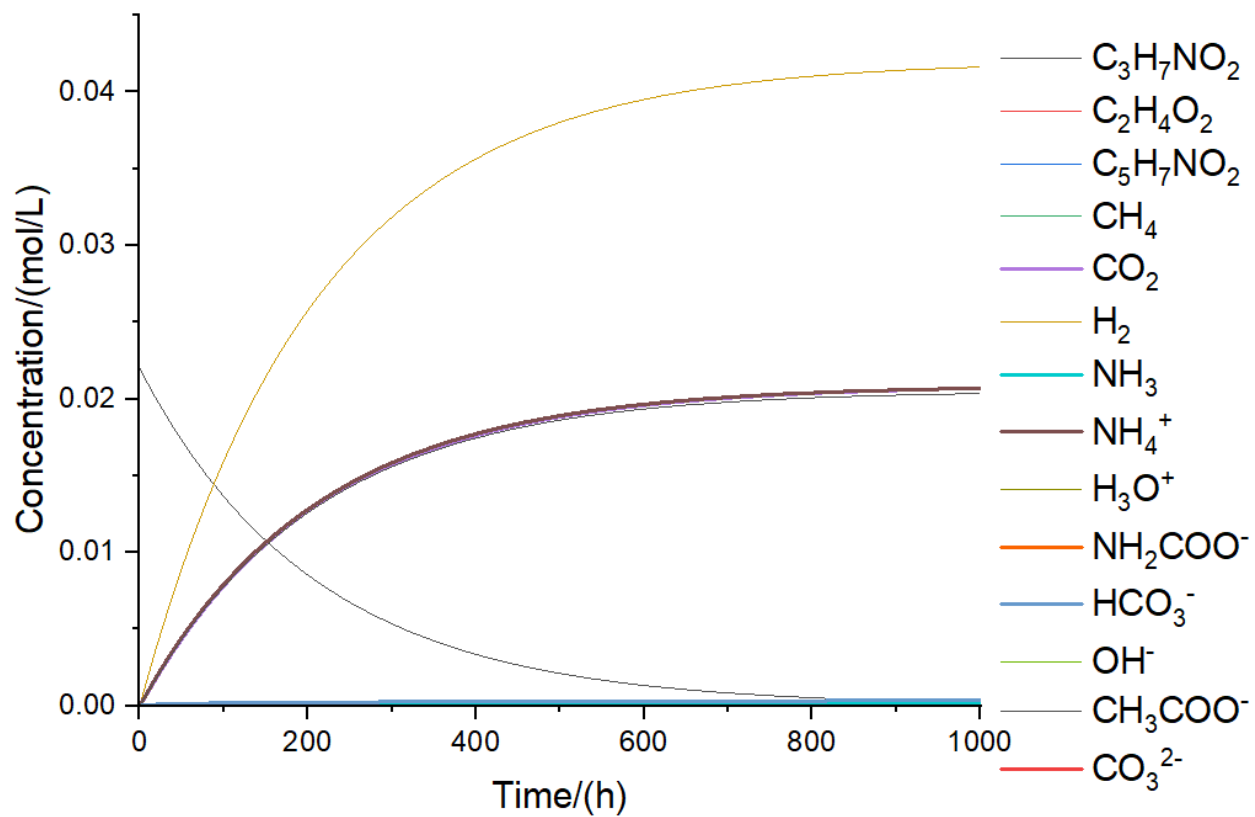

**Figure S15.** Concentration profile of the species of inorganic nitrogen and inorganic carbon during the fermentation of alanine. The feedstock that was considered to perform this anaerobic digestion consisted of 90% moisture.



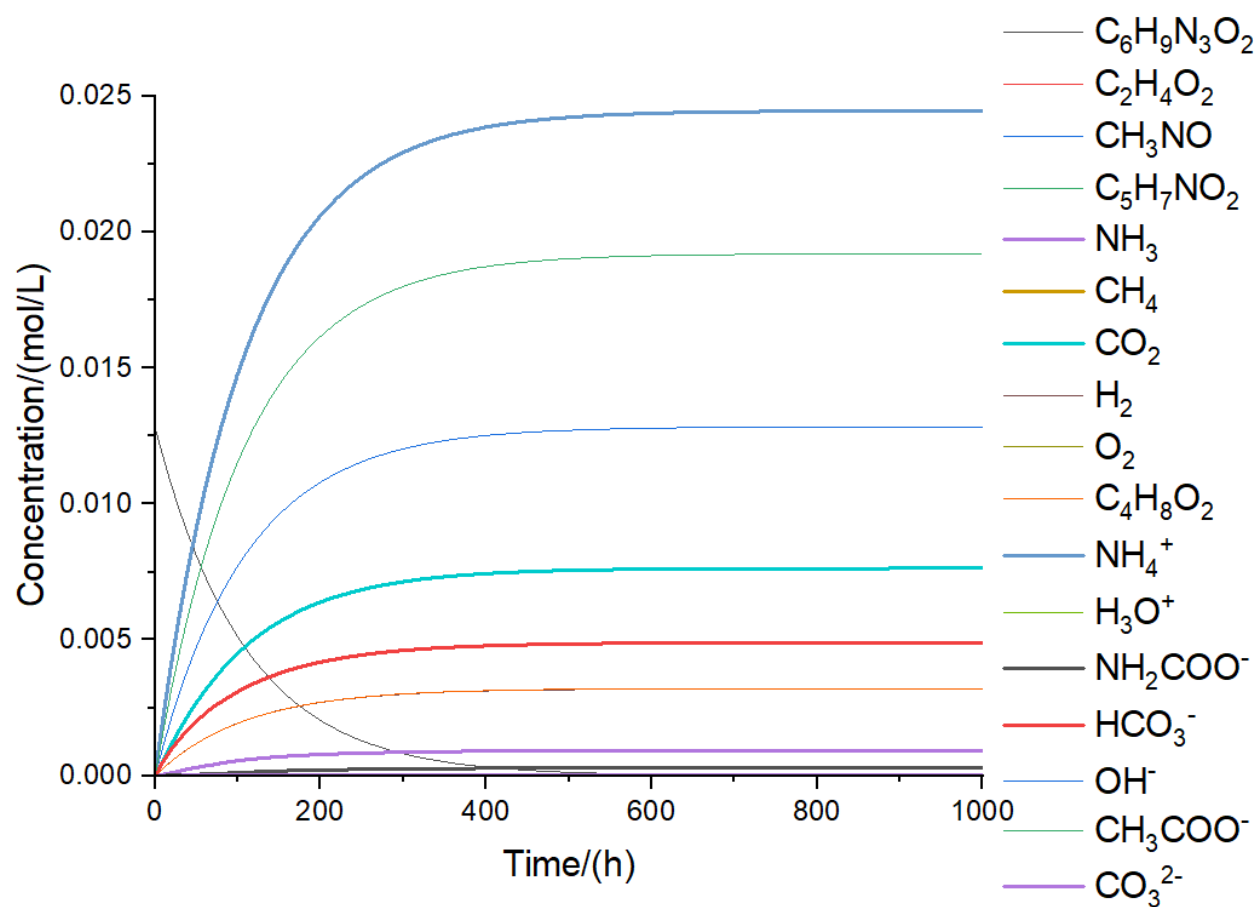

**Figure S16.** Concentration profile of the species of inorganic nitrogen and inorganic carbon during the fermentation of histidine. The feedstock that was considered to perform this anaerobic digestion consisted of 90% moisture.

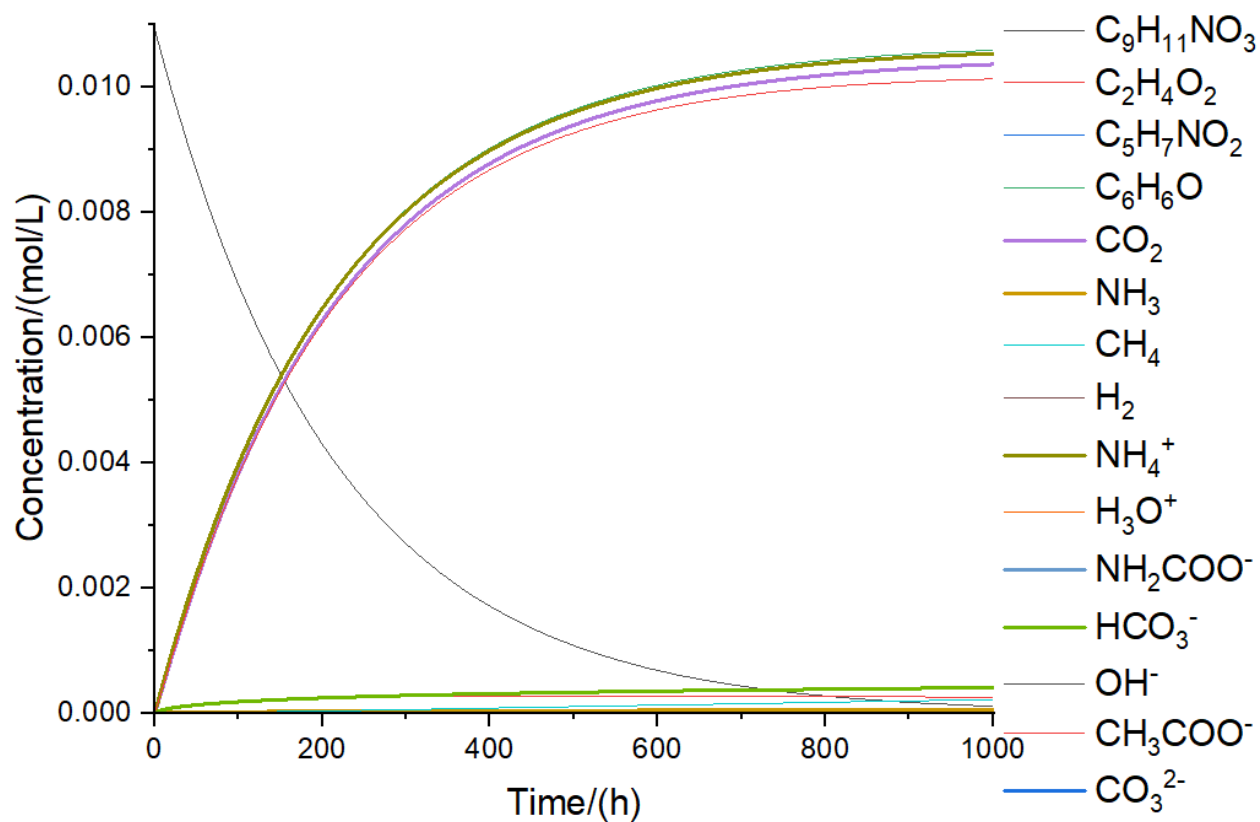

**Figure S17.** Concentration profile of the species of inorganic nitrogen and inorganic carbon during the fermentation of tryptophan. The feedstock that was considered to perform this anaerobic digestion consisted of 90% moisture.

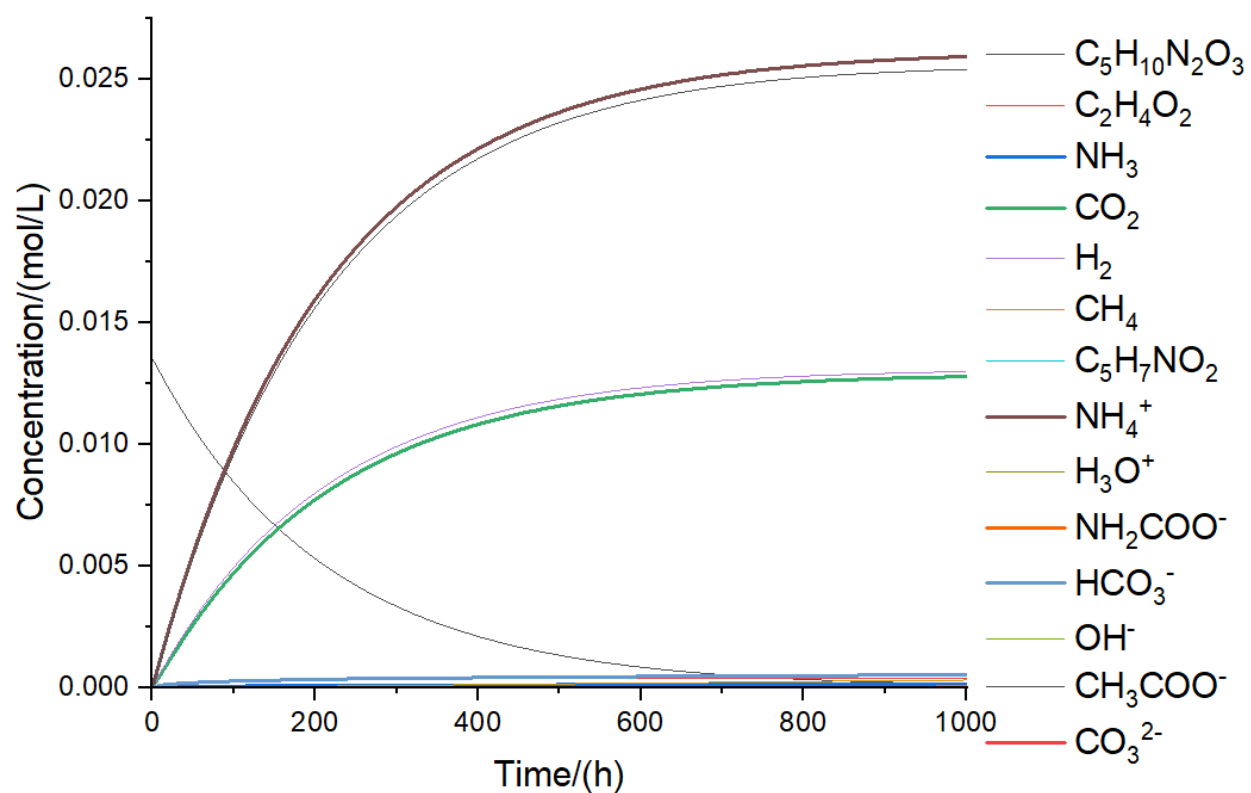

**Figure S18.** Concentration profile of the species of inorganic nitrogen and inorganic carbon during the fermentation of glutamine. The feedstock that was considered to perform this anaerobic digestion consisted of 90% moisture.
